# Supplementary material
Source: publisher site journal article supplement (https://www.dovepress.com/article/289384)
Supplement: Supplementary file 1 [file get_supplementary_file.php]

| Room | Nurse/Cisco | Patient/ Age/ Diagnosis | Doctor | code               | isolation                                    | PROTOCOLS                           | O2/Heart | Lines                          | Titration    | Accucheck                  | Drains                                      | Skin                                        | Bath      | Diet                       | void                                          | Neuro                              | Restraints          | Acuity             | Special |
|------|-------------|-------------------------|--------|--------------------|----------------------------------------------|-------------------------------------|----------|--------------------------------|--------------|----------------------------|---------------------------------------------|---------------------------------------------|-----------|----------------------------|-----------------------------------------------|------------------------------------|---------------------|--------------------|---------|
| 1    |             |                         |        | Full<br>DNR<br>DNI | Enhanced<br>Droplet<br>Airborne<br>Neg press | Heparin<br>CABG<br>Hypotherm<br>DKA | /        | Central<br>Peripheral<br>Other | Drip<br>___# | Endotool<br>AC/HS<br>Q___H | NG/OG<br>Chesttubes<br>JP/ Penrose<br>Other | Intact<br>Wound(s)<br>Wound/Vac<br>Incision | Yes<br>No | NPO<br>Ordered<br>TPN/Tube | Foley<br>Assist<br>Flexi/Stoma<br>Independent | Forgetful<br>Confused<br>Combative | Yes<br>No<br>Sitter | Low<br>Med<br>High |         |
| 2    |             |                         |        | Full<br>DNR<br>DNI | Enhanced<br>Droplet<br>Airborne<br>Neg press | Heparin<br>CABG<br>Hypotherm<br>DKA | /        | Central<br>Peripheral<br>Other | Drip<br>___# | Endotool<br>AC/HS<br>Q___H | NG/OG<br>Chesttubes<br>JP/ Penrose<br>Other | Intact<br>Wound(s)<br>Wound/Vac<br>Incision | Yes<br>No | NPO<br>Ordered<br>TPN/Tube | Foley<br>Assist<br>Flexi/Stoma<br>Independent | Forgetful<br>Confused<br>Combative | Yes<br>No<br>Sitter | Low<br>Med<br>High |         |
| 3    |             |                         |        | Full<br>DNR<br>DNI | Enhanced<br>Droplet<br>Airborne<br>Neg press | Heparin<br>CABG<br>Hypotherm<br>DKA | /        | Central<br>Peripheral<br>Other | Drip<br>___# | Endotool<br>AC/HS<br>Q___H | NG/OG<br>Chesttubes<br>JP/ Penrose<br>Other | Intact<br>Wound(s)<br>Wound/Vac<br>Incision | Yes<br>No | NPO<br>Ordered<br>TPN/Tube | Foley<br>Assist<br>Flexi/Stoma<br>Independent | Forgetful<br>Confused<br>Combative | Yes<br>No<br>Sitter | Low<br>Med<br>High |         |

Appendix 1: CCU Shift Reporting sheet final product.
